# Supplementary material for: A Self-Organizing State-Space-Model Approach for Parameter Estimation in Hodgkin-Huxley-Type Models of Single Neurons
Source: PLOS journal article supplement (doi:10.1371/journal.pcbi.1002401), 2012-03-01
Supplement: S8 (10.1371/journal.pcbi.1002401.s008) [file journal.pcbi.1002401.s008]

301 Moved Permanently

# Moved Permanently

The document has moved here.

---

Apache Server at www.ploscompbiol.org Port 80
